# Supplementary material for: Association of Mortality and Acute Aortic Events With Ascending Aortic Aneurysm: A Systematic Review and Meta-analysis
Source: PubMed Central journal article supplement (PMC6324275; doi:10.1001/jamanetworkopen.2018.1281), 2018-08-24
Supplement: jamanetwopen-1-e181281-s001.pdf [file jamanetwopen-1-e181281-s001.pdf]

## Supplementary Online Content

Guo M, Appoo JJ, Saczkowski R, et al. Association of mortality and acute aortic events with ascending aortic aneurysm: a systematic review and meta-analysis. *JAMA Netw Open*. 2018;1(4):e181281. doi:10.1001/jamanetworkopen.2018.1281

**eAppendix 1.** Mean Initial Aneurysm Diameter and Growth Rate From the Included Articles

**eAppendix 2.** Incidences of Aortic Dissection or Rupture From the Published Articles

**eAppendix 3.** Incidences of Elective Aortic Surgery From the Published Articles

**eAppendix 4.** All-Cause Mortality From the Published Articles

This supplementary material has been provided by the authors to give readers additional information about their work.

**eAppendix 1. Mean initial aneurysm diameter and growth rate from the included articles.** TAV = tricuspid aortic valve; BAV = bicuspid aortic valve; FU = Follow-up

| Author                   | Year | MEAN INITIAL ANEURYSM DIAMETER (cm) | GROWTH RATE                      |             |              |                        |
|--------------------------|------|-------------------------------------|----------------------------------|-------------|--------------|------------------------|
|                          |      |                                     | Mean Growth rate (cm/yr)         | Sample Size | Mean FU Time | Median FU Time         |
| <b>ISOLATED TAVs</b>     |      |                                     |                                  |             |              |                        |
| La Cana, G.              | 2006 | 4.59 ± 0.51                         | 0.075 ± 0.11                     | 86          | 3.31 ± 2.33  | -                      |
| Davies, R. R.            | 2007 | 4.94                                | 0.13 ± 0.02                      | 451         | 3.52         | -                      |
| Gaudino M.               | 2011 | 5.6 ± 0.2                           | 0.03 ± 0.02                      | 64          | 14.7 ± 4.8   | -                      |
| Detaint, D.              | 2014 | 4.45 ± 0.4                          | 0.02 ± 0.03                      | 51          | 3.6 ± 1.2    | -                      |
| Matsuyama, K.            | 2005 | -                                   | -                                | -           | -            | -                      |
| Lee SH                   | 2013 | 4.31 ± 0.3                          | -0.06 (IQR: -0.17, 0.19; median) | 223         | -            | 2.08 (IQR: 1.05, 3.99) |
| Kim JB                   | 2016 | 4.19 ± 0.25                         | 0.009 ± 0.004                    | 1414        | -            | 3.91 (IQR: 2.14, 5)    |
| <b>ISOLATED BAVs</b>     |      |                                     |                                  |             |              |                        |
| Ferencik, M.             | 2003 | 3.7 ± 0.7                           | 0.09 ± 0.03                      | 68          | 3.91 ± 2.25  | -                      |
| La Cana, G.              | 2006 | 4.73 ± 0.54                         | 0.081 ± 0.11                     | 27          | 2.96 ± 2.17  | -                      |
| Davies, R.R.             | 2007 | 4.62                                | 0.19 ± 0.06                      | 70          | 3.6          | -                      |
| Etz, C.D.                | 2010 | 4.6 ± 0.5                           | 0.077                            | 116         | 4.2 ± 2.9    | -                      |
| Michelena, H.I.          | 2011 | 4.8 ± 0.6                           | -                                | -           | -            | -                      |
| Detaint, D.              | 2014 | 3.79 ± 0.6                          | 0.042 ± 0.06                     | 353         | 3.6 ± 1.2    | -                      |
| Avadhani, S.A.           | 2015 | 3.55 ± 0.56                         | 0.047 ± 0.005                    | 90          | 4.8          | -                      |
| Kim, JB.                 | 2016 | 4.31 ± 0.32                         | 0.022 ± 0.008                    | 586         | -            | 3.91 (IQR: 2.14, 5)    |
| <b>MIXED TAVs + BAVs</b> |      |                                     |                                  |             |              |                        |
| Geisbusch, S.            | 2014 | -                                   | 0.019 ± 0.09                     | 166         | 4.19         | -                      |
| Gagnes-Loranger, M.      | 2016 | -                                   | 0.042 ± 0.082                    | 251         | 4.3 ± 2.5    | -                      |
| Vapniks, JS.             | 2016 | 4.7 ± 0.5                           | -                                | -           | -            | -                      |
| Park KH                  | 2017 |                                     | 0.03 ± 0.05                      | 509         | 4.3 ± 2.4    | 5.3 (IQR: 3.4, 7.6)    |
| <b>UNSPECIFIED</b>       |      |                                     |                                  |             |              |                        |
| Joyce, J.W.              | 1964 |                                     | -                                | -           | -            | -                      |
| Masuda, Y.               | 1992 |                                     | -                                | -           | -            | -                      |
| Andrus, B.W.             | 2003 | 3.6 ± 0.6                           | -0.10 ± 0.70                     | 107         | 2.8          | -                      |
| Bassano, C.              | 2005 | 4.3 ± 0.4                           | 0.02 ± 0.34                      | 38          | 3.5 ± 2.3    | -                      |
| Angeloni, E.             | 2015 | 3.89 ± 0.25                         | Statin: 0.095                    | 329         | 2.88 ± 0.55  | -                      |
|                          |      | 3.91 ± 0.26                         | non-Statin: 0.13                 | 329         | 2.88 ± 0.55  | -                      |

**eAppendix 2. Incidences of aortic dissection or rupture from the published articles.** TAV = tricuspid aortic valve; BAV = bicuspid aortic valve; AD = aortic dissection; R = rupture; UD = unknown death; FU = Follow-up

| Author                   | Year | INCIDENCES OF AD OR R     |    |         |    |         |             |              |                        |
|--------------------------|------|---------------------------|----|---------|----|---------|-------------|--------------|------------------------|
|                          |      | Reported Number of Events |    |         |    |         | Sample Size | Mean FU Time | Median FU Time         |
|                          |      | AD                        | R  | AD or R | UD | AD/R/UD |             |              |                        |
| <b>ISOLATED TAVs</b>     |      |                           |    |         |    |         |             |              |                        |
| La Cana, G.              | 2006 | 1                         | 0  | 1       | 2  | 3       | 86          | 3.31 ± 2.33  | -                      |
| Davies, R. R.            | 2007 | 38                        | 15 | 47      | -  | 116     | 451         | 5.31         | -                      |
| Gaudino M.               | 2011 | 0                         | 0  | 0       | 0  | 0       | 93          | 14.7 ± 4.8   | -                      |
| Detaint, D.              | 2014 | -                         | -  | -       | -  | -       | -           | -            | -                      |
| Matsuyama, K.            | 2005 | -                         | -  | 2       | -  | -       | 15          | 8.1          | -                      |
| Lee SH                   | 2013 | 1                         | -  | -       | -  | -       | 223         | -            | 3.63 (IQR: 2.04, 5.73) |
| Kim JB                   | 2016 | 12                        | 1  | 13      | -  | -       | 4068        | 3.77         | 3.34 (IQR: 1.36, 5)    |
| <b>ISOLATED BAVs</b>     |      |                           |    |         |    |         |             |              |                        |
| Ferencik, M.             | 2003 | 1                         | -  | 1       | -  | -       | 68          | 3.91 ± 2.25  | -                      |
| La Cana, G.              | 2006 | 0                         | 0  | 0       | 0  | 0       | 27          | 2.96 ± 2.17  | -                      |
| Davies, R.R.             | 2007 | 4                         | 2  | 6       | -  | 6       | 70          | 5.43         | -                      |
| Etz, C.D.                | 2010 | 0                         | 0  | 0       | 4  | 4       | 116         | 4.2 ± 2.9    | -                      |
| Michelena, H.I.          | 2011 | 2                         | 0  | 2       | 0  | 2       | 32          | 15 ± 6       | -                      |
| Detaint, D.              | 2014 | -                         | -  | -       | -  | -       | -           | -            | -                      |
| Avadhani, S.A.           | 2015 | -                         | -  | -       | -  | -       | -           | -            | -                      |
| Kim, J.B.                | 2016 | 1                         | 0  | 1       | -  | -       | 586         | 3.77         | 3.34 (IQR: 1.36, 5)    |
| <b>MIXED TAVs + BAVs</b> |      |                           |    |         |    |         |             |              |                        |
| Geisbusch, S.            | 2014 | 0                         | 0  | 0       | 0  | 0       | 232         | 4.19         | -                      |
| Gagnes-Loranger, M.      | 2016 | 1                         | 0  | 1       | 0  | 1       | 251         | 4.3 ± 2.5    | -                      |
| Vapniks, JS.             | 2016 | -                         | -  | 7       | -  | -       | 628         | -            | 3.33                   |
| Park KH                  | 2017 | 5                         | -  | 5       | -  | -       | 509         | 5.6 ± 2.6    | -                      |
| <b>UNSPECIFIED</b>       |      |                           |    |         |    |         |             |              |                        |
| Joyce, J.W.              | 1964 | -                         | -  | -       | -  | -       | -           | -            | -                      |
| Masuda, Y.               | 1992 | -                         | 2  | -       | -  | -       | 22          | 3.4          | -                      |
| Andrus, B.W.             | 2003 | -                         | -  | -       | -  | -       | -           | -            | -                      |
| Bassano, C.              | 2005 | 1                         | 0  | 1       | 2  | 4       | 38          | 3.5 ± 2.3    | -                      |
| Angeloni, E.             | 2015 | -                         | -  | -       | -  | -       | -           | -            | -                      |

**eAppendix 3. Incidences of elective aortic surgery from the published articles.** TAV = tricuspid aortic valve; BAV = bicuspid aortic valve; No. = number; FU = Follow-up

| Author                   | Year | INCIDENCE OF ELECTIVE AORTIC SURGERY |                   |              |                        |
|--------------------------|------|--------------------------------------|-------------------|--------------|------------------------|
|                          |      | No. of Events                        | Total Sample Size | Mean FU Time | Median FU Time         |
| <b>ISOLATED TAVs</b>     |      |                                      |                   |              |                        |
| La Cana, G.              | 2006 | 9                                    | 86                | 3.31 ± 2.33  | -                      |
| Davies, R. R.            | 2007 | 202                                  | 451               | 5.31         | -                      |
| Gaudino M.               | 2011 | 0                                    | 93                | 14.7 ± 4.8   | -                      |
| Detaint, D.              | 2014 | -                                    | -                 | -            | -                      |
| Matsuyama, K.            | 2005 | 1                                    | 15                | 8.1          | -                      |
| Lee SH                   | 2013 | 0                                    | 223               | -            | 3.63 (IQR: 2.04, 5.73) |
| Kim JB                   | 2016 | 68                                   | 4068              | 3.77         | 3.34 (IQR: 1.36, 5)    |
| <b>ISOLATED BAVs</b>     |      |                                      |                   |              |                        |
| Ferencik, M.             | 2003 | 3                                    | 68                | 3.91 ± 2.25  | -                      |
| La Cana, G.              | 2006 | 2                                    | 27                | 2.96 ± 2.17  | -                      |
| Davies, R.R.             | 2007 | 51                                   | 70                | 5.43         | -                      |
| Etz, C.D.                | 2010 | 45                                   | 116               | 4.2 ± 2.9    | -                      |
| Michelena, H.I.          | 2011 | 13                                   | 32                | 15 ± 6       | -                      |
| Detaint, D.              | 2014 | -                                    | -                 | -            | -                      |
| Avadhani, S.A.           | 2015 | -                                    | -                 | -            | -                      |
| Kim, J.B.                | 2016 | 108                                  | 586               | 3.77         | 3.34 (IQR: 1.36, 5)    |
| <b>MIXED TAVs + BAVs</b> |      |                                      |                   |              |                        |
| Geisbusch, S.            | 2014 | 3                                    | 232               | 4.19         | -                      |
| Gagnes-Loranger, M.      | 2016 | 29                                   | 251               | 4.3 ± 2.5    | -                      |
| Vapniks, JS.             | 2016 | 168                                  | 628               | -            | 3.33                   |
| Park KH                  | 2017 | 10                                   | 509               | 5.6 ± 2.6    | -                      |
| <b>UNSPECIFIED</b>       |      |                                      |                   |              |                        |
| Joyce, J.W.              | 1964 | -                                    | -                 | -            | -                      |
| Masuda, Y.               | 1992 | 5                                    | 22                | 3.4          | -                      |
| Andrus, B.W.             | 2003 | -                                    | -                 | -            | -                      |
| Bassano, C.              | 2005 | 2                                    | 38                | 3.5 ± 2.3    | -                      |
| Angeloni E.              | 2015 | -                                    | -                 | -            | -                      |

**eAppendix 4. All-cause mortality from the published articles.** TAV = tricuspid aortic valve; BAV = bicuspid aortic valve; No. = number; FU = Follow-up

| Author                   | Year | ALL-CAUSE MORTALITY  |             |              |                     |
|--------------------------|------|----------------------|-------------|--------------|---------------------|
|                          |      | No. of Event (Death) | Sample Size | Mean FU Time | Median FU Time      |
| <b>ISOLATED TAVs</b>     |      |                      |             |              |                     |
| La Cana, G.              | 2006 | 5                    | 86          | 3.31 ± 2.33  | -                   |
| Davies, R. R.            | 2007 | 137                  | 451         | 5.31         | -                   |
| Gaudino M.               | 2011 | 16                   | 93          | 14.7 ± 4.8   | -                   |
| Detaint, D.              | 2014 | -                    | -           | -            | -                   |
| Matsuyama, K.            | 2005 | -                    | -           | -            | -                   |
| Lee SH                   | 2013 | -                    | -           | -            | -                   |
| Kim JB                   | 2016 | 706                  | 4068        | 3.77         | 3.34 (IQR: 1.36, 5) |
| <b>ISOLATED BAVs</b>     |      |                      |             |              |                     |
| Ferencik, M.             | 2003 | -                    | -           | -            | -                   |
| La Cana, G.              | 2006 | 0                    | 27          | 2.96 ± 2.17  | -                   |
| Davies, R.R.             | 2007 | 3                    | 70          | 5.43         | -                   |
| Etz, C.D.                | 2010 | 16                   | 116         | 4.2 ± 2.9    | -                   |
| Michelena, H.I.          | 2011 | 6                    | 32          | 15 ± 6       | -                   |
| Detaint, D.              | 2014 | -                    | -           | -            | -                   |
| Avadhani, S.A.           | 2015 | -                    | -           | -            | -                   |
| Kim, JB.                 | 2016 | 32                   | 586         | 3.77         | 3.34 (IQR: 1.36, 5) |
| <b>MIXED TAVs + BAVs</b> |      |                      |             |              |                     |
| Geisbusch, S.            | 2014 | -                    | -           | -            | -                   |
| Gagnes-Loranger, M.      | 2016 | 4                    | 251         | 4.3 ± 2.5    | -                   |
| Vapniks, JS.             | 2016 | 17                   | 628         | -            | 3.33                |
| Park KH                  | 2017 | 121                  | 509         | 5.6 ± 2.6    | -                   |
| <b>UNSPECIFIED</b>       |      |                      |             |              |                     |
| Joyce, J.W.              | 1964 | 40                   | 57          | 10           | -                   |
| Masuda, Y.               | 1992 | -                    | -           | -            | -                   |
| Andrus, B.W.             | 2003 | -                    | -           | -            | -                   |
| Bassano, C.              | 2005 | 3                    | 38          | 3.5 ± 2.3    | -                   |
| Angeloni E.              | 2015 | -                    | -           | -            | -                   |
